# Supplementary material
Source: PubMed Central journal article supplement (PMC9288496)
Supplement: NIHMS1778132-supplement-tS1-4.pdf [file NIHMS1778132-supplement-tS1-4.pdf]

# **Physiologically Based Pharmacokinetic Modeling of Metformin in Children and Adolescents with Obesity: Supplemental Tables**

Jennifer Lynn Ford, PhD <sup>1</sup>, Jacqueline G. Gerhart, MS <sup>1</sup>, Andrea N. Edginton, PhD <sup>2</sup>, Jack A. Yanovski, MD, PhD <sup>3</sup>, Yuen Yi Hon, PharmD, BCOP <sup>4</sup>, and Daniel Gonzalez, PharmD, PhD <sup>1,\*</sup>

<sup>1</sup> Division of Pharmacotherapy and Experimental Therapeutics, UNC Eshelman School of Pharmacy, The University of North Carolina at Chapel Hill, Chapel Hill, NC, USA

<sup>2</sup> School of Pharmacy, University of Waterloo, Waterloo, Ontario, Canada

<sup>3</sup> Section on Growth and Obesity, Program in Developmental Endocrinology and Genetics, Eunice Kennedy Shriver National Institute of Child Health and Human Development, National Institutes of Health, Bethesda, MD, USA

<sup>4</sup> Division of Rare Diseases and Medical Genetics, Office of Rare Diseases, Pediatrics, Urologic and Reproductive Medicine, Office of New Drugs, Center for Drug Evaluation and Research, US Food and Drug Administration, Silver Spring, MD, USA

\* Correspondence should be addressed to Daniel Gonzalez; 3312 Kerr Hall, CB# 7569, Chapel Hill, NC, 27599-7569; (919) 966-9984; daniel.gonzalez@unc.edu

Table S1. Drug specific parameters from the published adult metformin PBPK model adopted for use in children and adolescents.

| Parameter                                   | Value    | Unit       |
|---------------------------------------------|----------|------------|
| <b>Physiochemical properties</b>            |          |            |
| Molecular weight                            | 129.16   | g/mol      |
| pK <sub>a1</sub> (base)                     | 2.8      |            |
| pK <sub>a2</sub> (base)                     | 11.5     |            |
| Solubility (pH 6.8)                         | 350.90   | g/l        |
| Log <i>P</i>                                | -1.43    |            |
| <i>F</i> <sub>u</sub>                       | 100      | %          |
| <b>ADME</b> <sup>a</sup>                    |          |            |
| PMAT K <sub>m</sub>                         | 367.57   | μmol/l     |
| PMAT V <sub>max</sub>                       | 76.47    | μmol/l/min |
| PMAT Hill                                   | 3.0      |            |
| OCT1 K <sub>m</sub>                         | 1180.0   | μmol/l     |
| OCT1 V <sub>max</sub>                       | 641.19   | μmol/l/min |
| OCT2 K <sub>m</sub>                         | 810.0    | μmol/l     |
| OCT2 V <sub>max</sub>                       | 5.17E+04 | μmol/l/min |
| MATE1 K <sub>m</sub>                        | 283.0    | μmol/l     |
| MATE1 V <sub>max</sub>                      | 165.69   | μmol/l/min |
| GFR fraction                                | 1.0      |            |
| EHC continuous fraction                     | 1.0      |            |
| Cellular permeability <sup>b</sup>          | 2.30E-04 | cm/min     |
| Intestinal permeability (apical)            | 8.49E-07 | cm/min     |
| Small intestinal permeability (basolateral) | 1.16E-05 | cm/min     |
| Large intestinal permeability (basolateral) | 0.0      | cm/min     |
| <b>Dissolution</b>                          |          |            |
| Weibull shape                               | 7.90     |            |
| Fasted Weibull time                         | 1.36     | min        |
| Fed Weibull time                            | 0.11     | min        |

Parameters were adopted from the adult model<sup>1</sup>; values for the adult model were obtained from the literature, optimized, assumed, or calculated.

<sup>a</sup> Partition coefficients were calculated using PK-Sim Standard calculation method.

<sup>b</sup> Cellular permeability was calculated using charge-dependent Schmitt normalized to PK-Sim calculation method.

EHC, enterohepatic circulation; *f*<sub>u</sub>, fraction unbound; GFR, glomerular filtration rate; K<sub>m</sub>, concentration of half-maximal transport; Log *P*, lipophilicity; MATE1, multidrug and toxin extrusion protein 1; OCT1, organic cation transporter 1; OCT2, organic cation transporter 2; PBPK, physiologically based

pharmacokinetic; pKa, negative log of the acid dissociation constant; PMAT, plasma membrane monoamine transporter;  $V_{\max}$ , maximal rate of metabolism or transport.

Table S2. System specific parameters used in the metformin PBPK model.

| Transporter | Reference concentration |      | Localization (primary)                              | Direction |
|-------------|-------------------------|------|-----------------------------------------------------|-----------|
|             | Mean                    | GSD  |                                                     |           |
| PMAT        | 1.0                     | 1.40 | Enterocyte (apical);<br>Other tissues (basolateral) | Influx    |
| OCT1        | 0.16                    | 1.50 | Liver (basolateral)                                 | Influx    |
| OCT2        | 0.19                    | 1.45 | Kidney (basolateral)                                | Influx    |
| MATE1       | 0.13                    | 1.53 | Kidney (apical)                                     | Efflux    |

Values are mean and GSD reference concentration for the corresponding transporter adopted from Hanke et al.<sup>1</sup>; GSD was added to population simulations to account for transporter variability.

GSD, geometric standard deviation; MATE1, multidrug and toxin extrusion 1; OCT1, organic cation transporter 1; OCT2, organic cation transporter 2; PBPK, physiologically based pharmacokinetic; PMAT, plasma membrane monoamine transporter.

Table S3. Observed pharmacokinetic parameters calculated for three populations of children and adolescents.

| Parameter                            | Non-overweight <sup>a</sup> | Overweight / obesity <sup>b</sup> | Severely obesity <sup>c</sup> |
|--------------------------------------|-----------------------------|-----------------------------------|-------------------------------|
| C <sub>max</sub> (mg/L) <sup>d</sup> | 3.49 ± 1.06 (2.64 – 4.69)   | 1.65                              | 2.99 ± 1.36 (1.17 – 8.10)     |
| AUC (h*mg/L) <sup>d</sup>            | 24.4 ± 7.65 (16.6 – 31.8)   | 9.46                              | 15.5 ± 6.96 (7.15 – 40.8)     |
| CL/F (mL/min)                        | 573 ± 193 (408 – 785)       | 1374                              | 970 ± 346 (319 – 1817)        |
| V/F (L)                              | 170 ± 68.7 (116 – 247)      | 379                               | 328 ± 158 (71.7 – 766)        |

<sup>a</sup> Mean ± SD (range) for parameters estimated using digitized concentration-time profiles including two individual subjects and median concentrations for four children.<sup>2</sup>

<sup>b</sup> Values calculated using median plasma concentrations for 22 adolescents.<sup>3</sup>

<sup>c</sup> Mean ± SD (range) for parameters calculated using concentration-time profiles for 29 children and adolescents<sup>4</sup>; one subject was excluded due to missing data.

<sup>d</sup> AUC calculated over the dosing interval at steady state; values normalized to 1000 mg dose.

AUC, area under the concentration-time curve calculated over the dosing interval at steady state; CL/F, oral clearance calculated as dose (mg) divided by AUC; C<sub>max</sub>, maximum plasma concentration of metformin at steady state; V/F, apparent volume of distribution calculated as CL/F divided by the elimination rate constant.

Table S4. Observed and predicted model results for children and adolescents classified as non-overweight and having overweight / obesity.

| Group                             | n  | Dose (mg) | C <sub>max</sub> (mg/L) |      |       | AUC (h*mg/L) |      |       | CL/F (mL/min) |      |       | V/F (L) |      |       |
|-----------------------------------|----|-----------|-------------------------|------|-------|--------------|------|-------|---------------|------|-------|---------|------|-------|
|                                   |    |           | Obs                     | Pred | Ratio | Obs          | Pred | Ratio | Obs           | Pred | Ratio | Obs     | Pred | Ratio |
| Non-Overweight <sup>a</sup>       |    |           |                         |      |       |              |      |       |               |      |       |         |      |       |
| LD                                | 1  | 425, qd   | 1.12                    | 1.16 | 1.03  | 7.04         | 7.45 | 1.06  | 785           | 742  | 0.94  | 247     | 208  | 0.84  |
| ID                                | 4  | 850, qd   | 2.67                    | 1.86 | 0.70  | 21.0         | 11.2 | 0.53  | 526           | 985  | 1.9   | 146     | 235  | 1.6   |
| HD                                | 1  | 850, qd   | 3.98                    | 2.14 | 0.54  | 27.1         | 13.5 | 0.50  | 408           | 818  | 2.0   | 116     | 210  | 1.8   |
| Overweight / obesity <sup>b</sup> |    |           |                         |      |       |              |      |       |               |      |       |         |      |       |
| Median                            | 22 | 1000, bid | 1.65                    | 2.19 | 1.3   | 9.46         | 12.6 | 1.3   | 1374          | 1028 | 0.75  | 379     | 284  | 0.75  |

Values are observed and predicted pharmacokinetic parameters derived either using concentration-time data for individual subjects, or the mean or median concentration-time profile for a group of subjects, as well as the ratio of predicted / observed values.

AUC, area under the concentration-time curve calculated over the dosing interval at steady state; CL/F, oral clearance calculated as dose (mg) divided by AUC; C<sub>max</sub>, maximum plasma concentration of metformin at steady state; V/F, apparent volume of distribution calculated as CL/F divided by the elimination rate constant.

<sup>a</sup> Concentration data were divided into 3 groups based on the published study<sup>2</sup>: one girl who received the lowest metformin dose (425 mg; 13 mg/kg), one girl who received the highest metformin dose when normalized to body weight (850 mg; 37 mg/kg), and the mean of 4 girls who received intermediate doses when normalized to body weight (850 mg; 21 – 29 mg/kg).

bid, twice daily; HD, highest dose; ID, intermediate dose; LD, lowest dose; Obs, observed; Pred, predicted; qd, once daily.

<sup>b</sup> Concentration data were digitized as the median of 22 children.<sup>3</sup>

**REFERENCES**

1. Hanke N, Türk D, Selzer D, et al. A comprehensive whole-body physiologically based pharmacokinetic drug–drug–gene interaction model of metformin and cimetidine in healthy adults and renally impaired individuals. *Clin Pharmacokinet.* 2020;59(11):1419–31.
2. Sánchez-Infantes D, Díaz M, López-Bermejo A, Marcos MV, de Zegher F, Ibáñez L. Pharmacokinetics of metformin in girls aged 9 years. *Clin Pharmacokinet.* 2011;50(11):735–8.
3. van Rongen A, van der Aa MP, Matic M, et al. Increased metformin clearance in overweight and obese adolescents: a pharmacokinetic substudy of a randomized controlled trial. *Pediatr Drugs.* 2018;20(4):365–74.
4. Sam WJ, Roza O, Hon YY, et al. Effects of SLC22A1 polymorphisms on metformin-induced reductions in adiposity and metformin pharmacokinetics in obese children with insulin resistance. *J Clin Pharmacol.* 2017;57(2):219–29.
